# Supplementary material for: An Improved Oil Palm Genome Assembly as a Valuable Resource for Crop Improvement and Comparative Genomics in the Arecoideae Subfamily
Source: MDPI journal article supplement (doi:10.3390/plants9111476), 2020-11-03
Supplement: s1 [file s1]

# An Improved Oil Palm Genome Assembly as a Valuable Resource for Crop Improvement and Comparative Genomics in the *Arecoideae* Subfamily

**Ai-Ling Ong <sup>1,2,\*</sup>, Chee-Keng Teh <sup>1,2</sup>, Sean Mayes <sup>2</sup>, Festo Massawe <sup>3</sup>, David Ross Appleton <sup>1</sup> and Harikrishna Kulaveerasingam <sup>1</sup>**

<sup>1</sup> Biotechnology & Breeding Department, Sime Darby Plantation R&D Centre, Serdang 43400, Selangor State, Malaysia; teh.chee.keng@sime-darbyplantation.com (C-K.T);

david.ross.appleton@sime-darbyplantation.com (D.R.A.); harikrishna.k@sime-darbyplantation.com (H.K)

<sup>2</sup> School of Biosciences, University of Nottingham, Sutton Bonington Campus, Leicestershire, LE12 5RD, UK; sean.mayes@nottingham.ac.uk

<sup>3</sup> School of Biosciences, University of Nottingham Malaysia, Semenyih 43500, Selangor State, Malaysia; festo.massawe@nottingham.edu.my

\* Correspondence: ong.ailing.sdtc@sime-darbyplantation.com



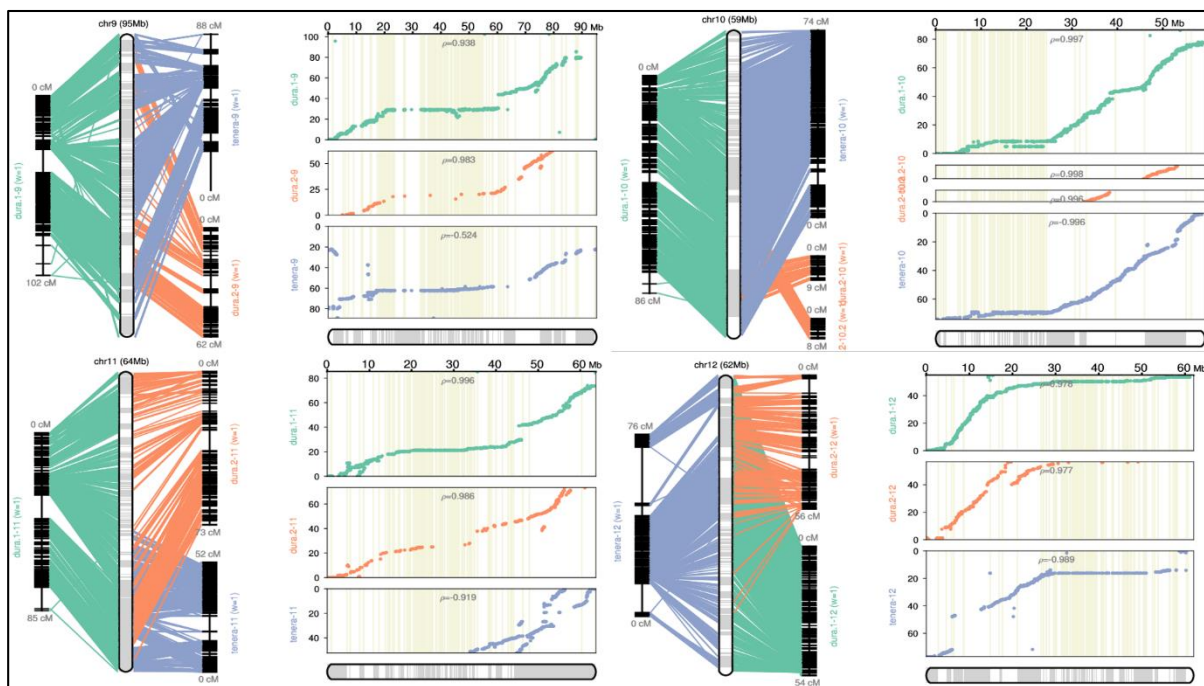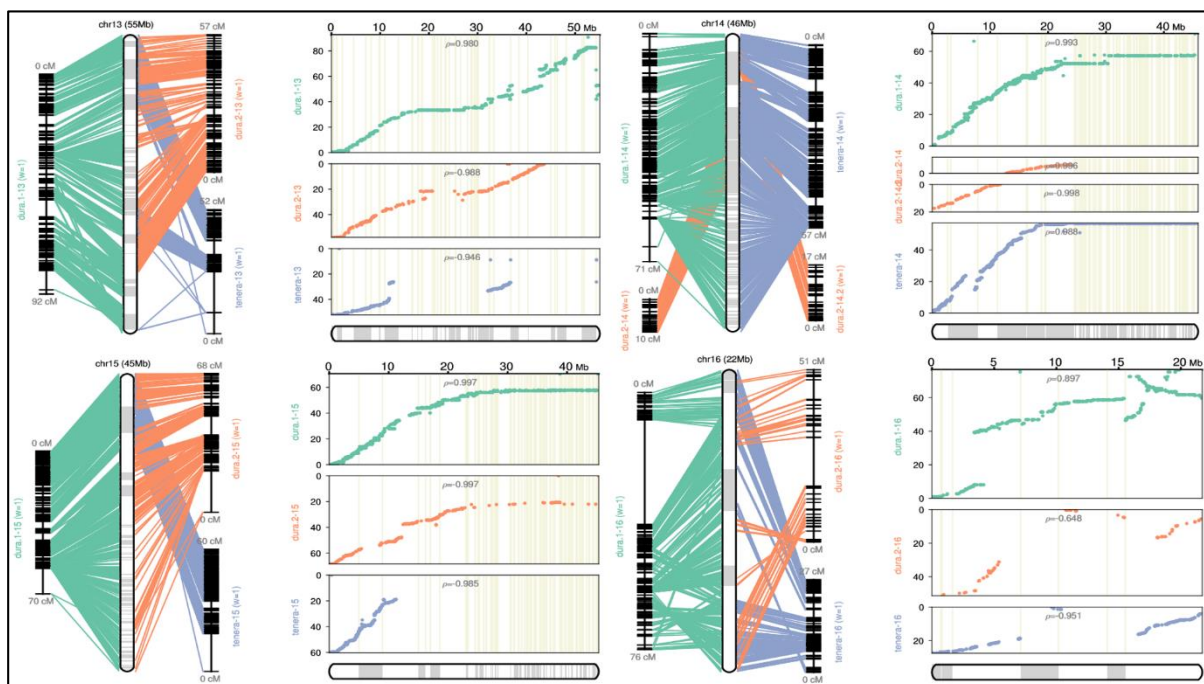

**Figure S2.** Correlation plots for locations of DNA marker located within date palm chromosome (pd-15) for genome assembly improvement versions by Al-Dous,E.K et al. (2011) and Hazzouri, K. M. et al (2019).

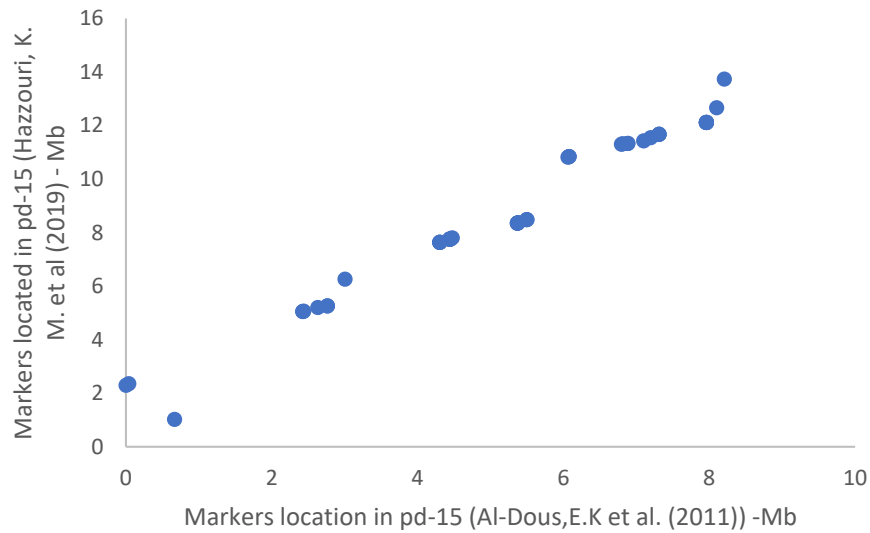

**Table S1.** Summary for consensus map generated from multiple linkage maps and statistics for SNP markers and scaffolds used to build genome assembly for PMv6.

| <b>Summary for Consensus Map</b> |                 |                 |                 |
|----------------------------------|-----------------|-----------------|-----------------|
|                                  | <u>Anchored</u> | <u>Oriented</u> | <u>Unplaced</u> |
| Markers(unique)                  | 39,616          | 31,657          | 347             |
| Markers per Mb                   | 33.6            | 41.7            | 11.4            |
| Scaffolds                        | 2,272           | 434             | 148             |
| Scaffolds with 1 marker          | 869             | 0               | 99              |
| Scaffolds with 2 markers         | 335             | 56              | 24              |
| Scaffolds with 3 markers         | 175             | 24              | 7               |
| Scaffolds with >=4 markers       | 893             | 354             | 18              |
| Total bases                      | 1,178,731,551   | 759,750,341     | 30,463,349      |
| Percentage                       | 97.5%           | 62.8%           | 2.5%            |
